# Supplementary material for: Hsa_circ_0024093 accelerates VSMC proliferation via miR-4677-3p/miR-889-3p/USP9X/YAP1 axis in in vitro model of lower extremity ASO
Source: PubMed Central journal article supplement — Mol Ther Nucleic Acids. 2021 Aug 8;26:511–22. doi: 10.1016/j.omtn.2021.07.026 (PMC8479279; doi:10.1016/j.omtn.2021.07.026), 2021-08-08
Supplement: mmc1.pdf [file mmc1.pdf]

OMTN, Volume 26

## Supplemental information

**Hsa\_circ\_0024093 accelerates VSMC proliferation**

**via miR-4677-3p/miR-889-3p/USP9X/YAP1 axis**

**in *in vitro* model of lower extremity ASO**

**Xue Zhang, Peng Wang, Kai Yuan, Maoran Li, Yiting Shen, Huafa Que, Yunfei Wang, and Wei Liang**

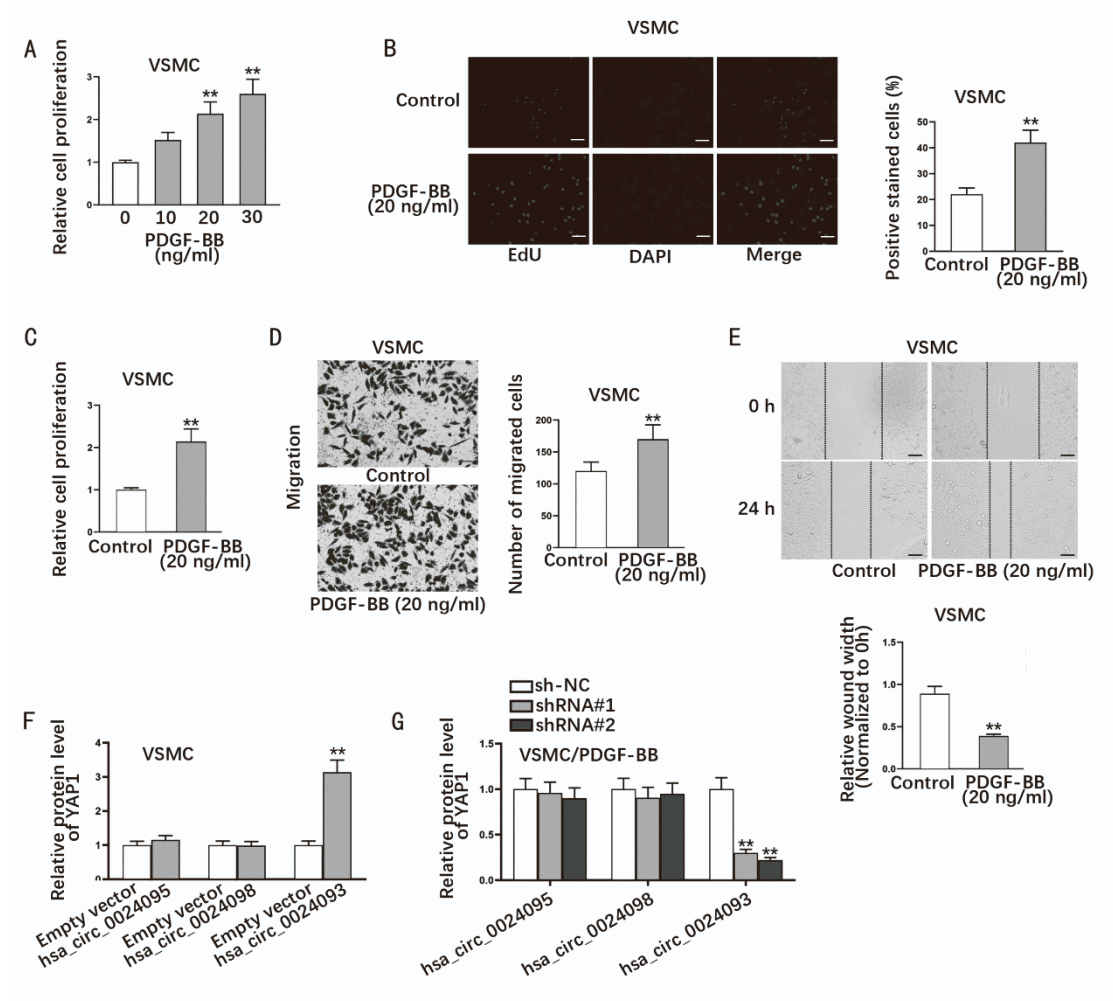

**Figure S1. PDGF-BB facilitates the proliferation and migration of VSMCs.**

A. The proliferation of VSMCs treated with different doses of PDGF-BB was examined. B-C. EdU (bar value = 100  $\mu$ m) and CCK-8 assays detected the proliferation of VSMCs treated with or without 20 ng/ml PDGF-BB. D-E. Transwell assay (bar value = 50  $\mu$ m) and wound healing assay (bar value = 100  $\mu$ m) examined the migration ability of VSMCs with or without PDGF-BB treatment. F-G. The quantification bar graphs of blots in Figure 1D-E were shown.

\*\*P<0.01.

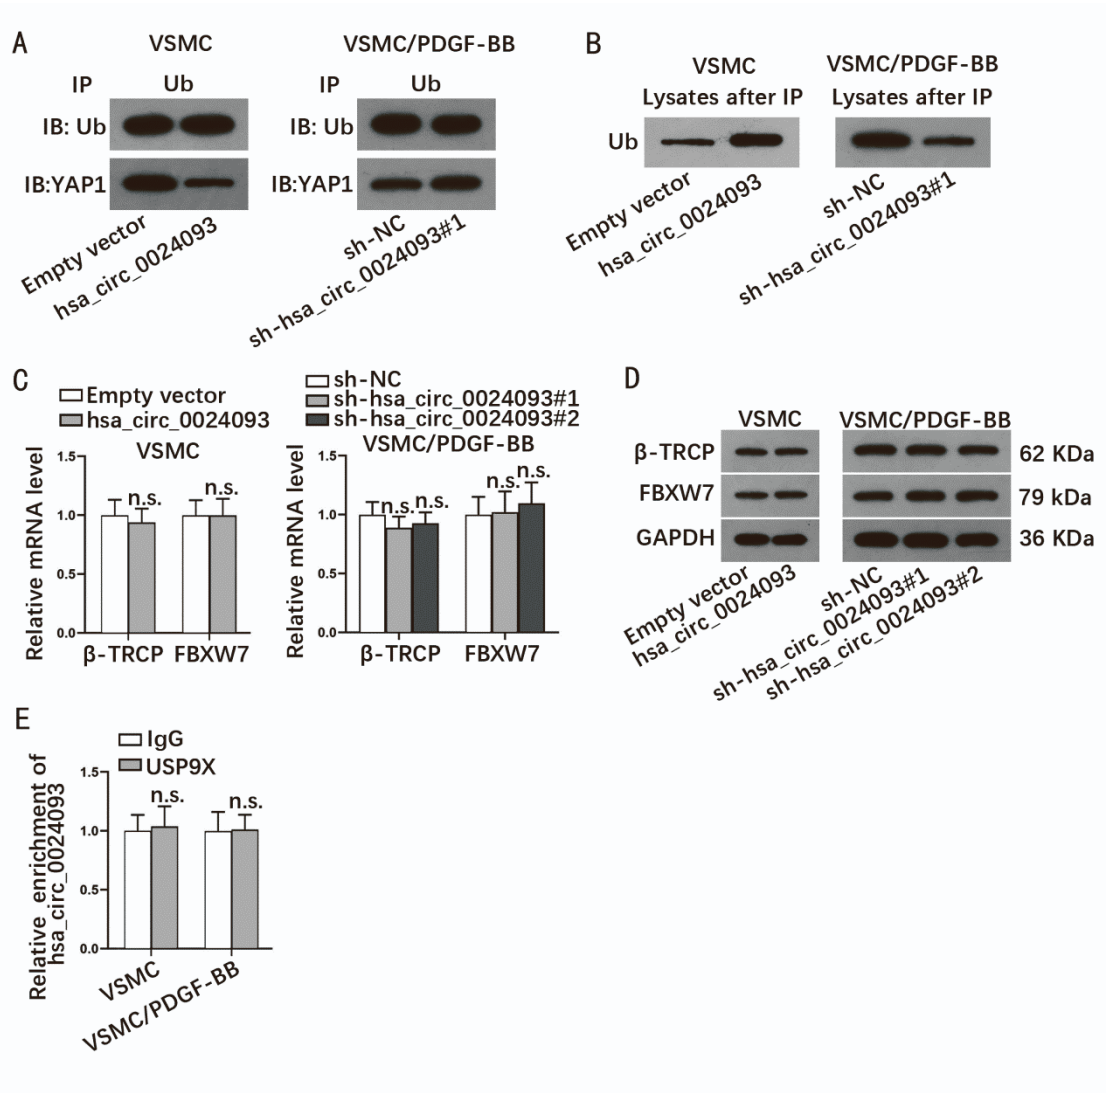

**Figure S2. Hsa\_circ\_0024093 regulates YAP1 ubiquitination not depending on FBXW7 or  $\beta$ -TRCP.**

A. The ubiquitination level of YAP1 in indicated VSMCs was detected. B. The level of free ubiquitin in lysates after IP was detected in indicated VSMCs. C-D. The mRNA level and protein level of FBXW7 and  $\beta$ -TRCP in indicated VSMCs were analyzed. E. The enrichment of hsa\_circ\_0024093 in USP9X groups was detected. n.s. meant no significance.

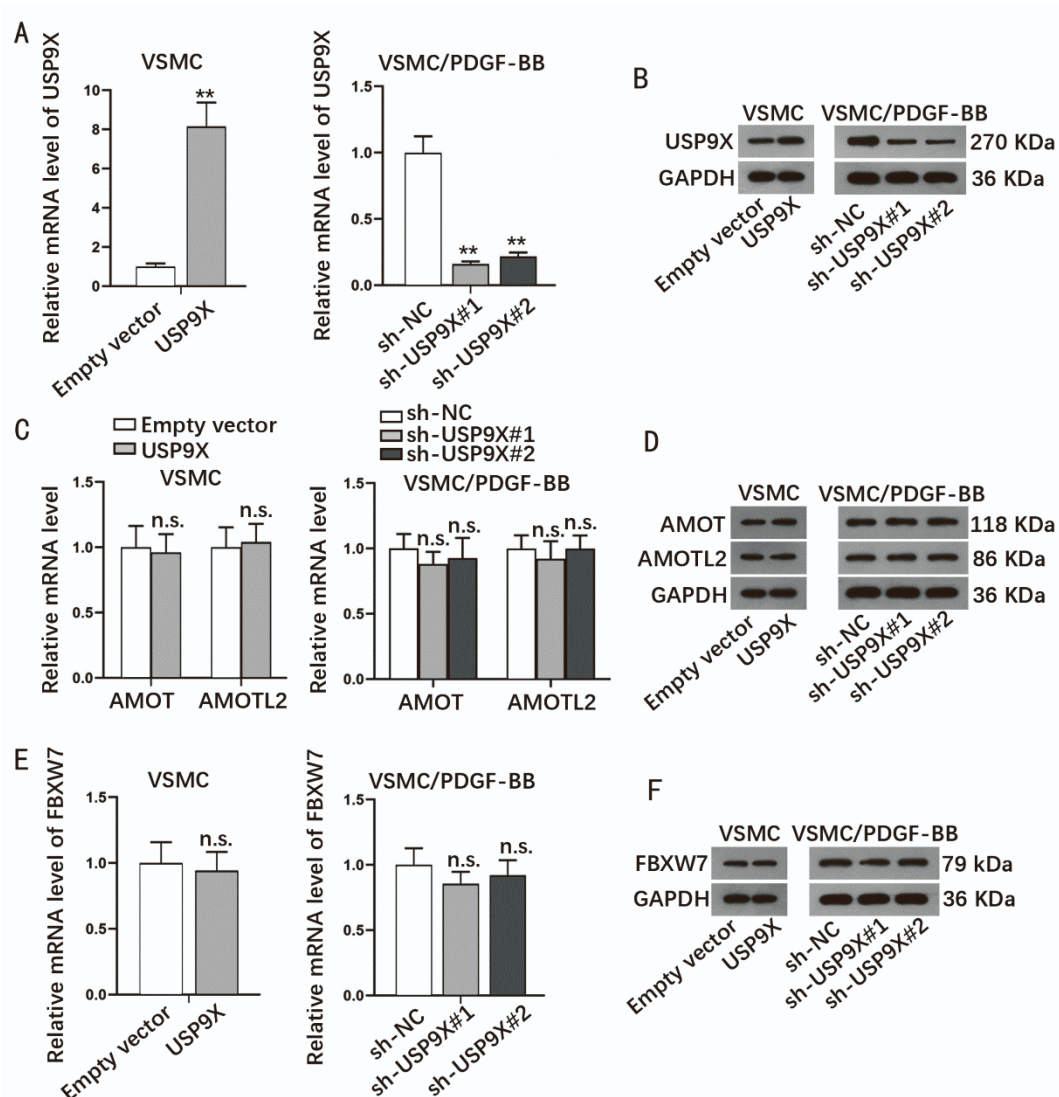

**Figure S3. USP9X cannot regulate the expression of AMOT, AMOTL2 and FBXW7 in VSMCs.**

A-B. USP9X expression in VSMCs with USP9X overexpression or in PDGF-BB treated VSMCs with USP9X knockdown was measured via RT-qPCR and western blot analyses. C-D. The mRNA and protein levels of AMOT and AMOTL2 were evaluated in USP9X-overexpressed VSMCs or in PDGF-BB treated VSMCs with USP9X down-regulation. E-F. The mRNA and protein levels of FBXW7 were calculated in USP9X-overexpressed VSMCs or in PDGF-BB treated VSMCs with USP9X silencing. \*\*P<0.01, n.s. meant no significance.

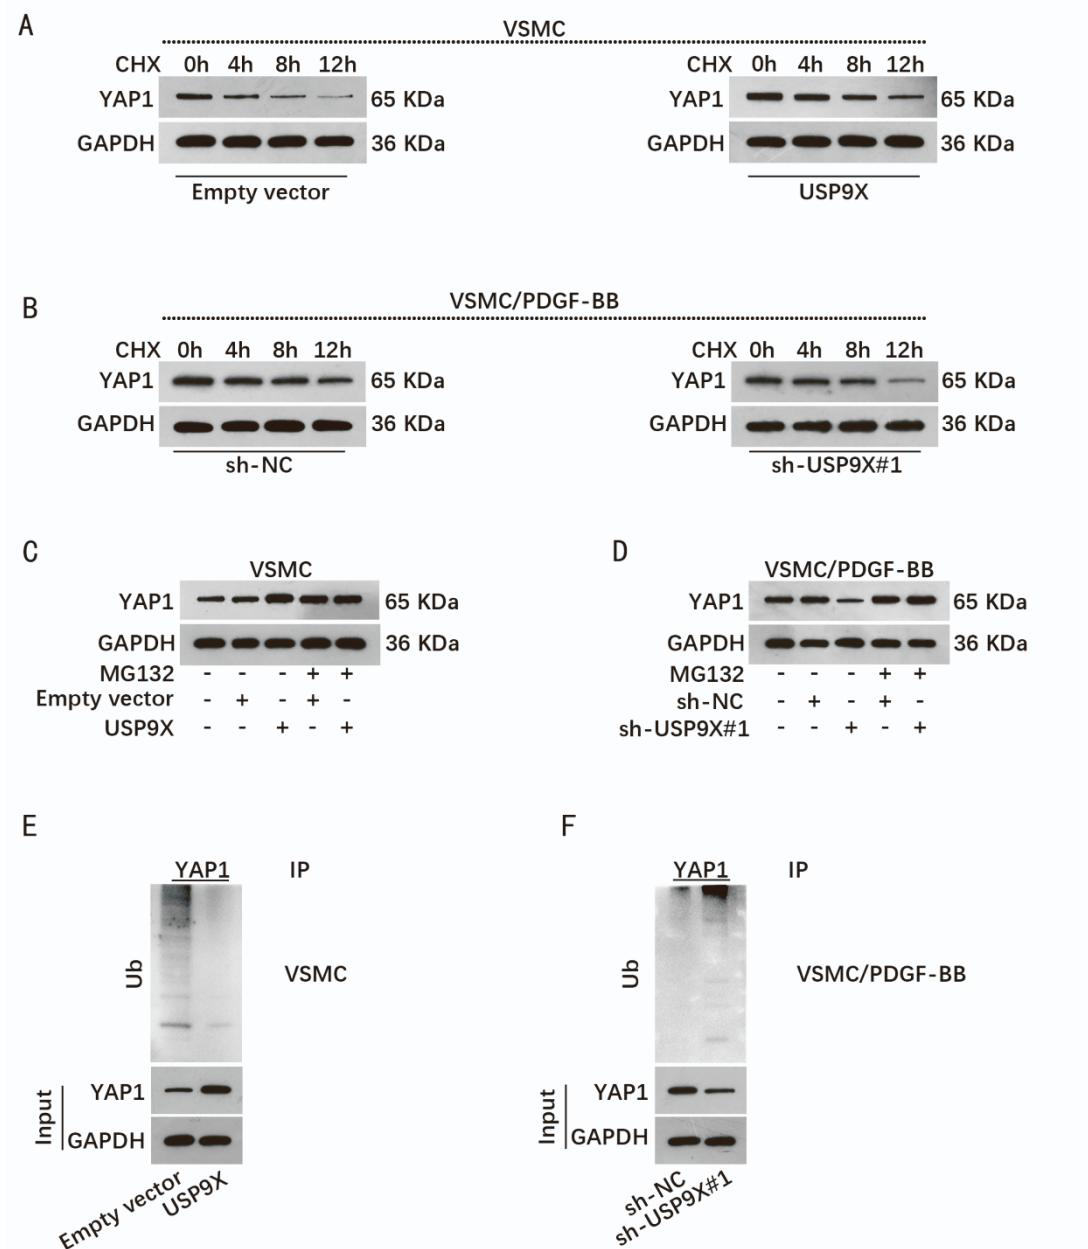

**Figure S4. USP9X enhances the stability of YAP1.**

A. The protein level of YAP1 was detected under CHX treatment in VSMCs in response to USP9X overexpression. B. The protein level of YAP1 under CHX treatment was calculated in PDGF-BB treated VSMCs with USP9X deficiency. C-D. YAP1 protein level in VSMCs under different treatment or transfections was investigated. E-F. The ubiquitination level of YAP1 in VSMCs under different contexts was assessed.

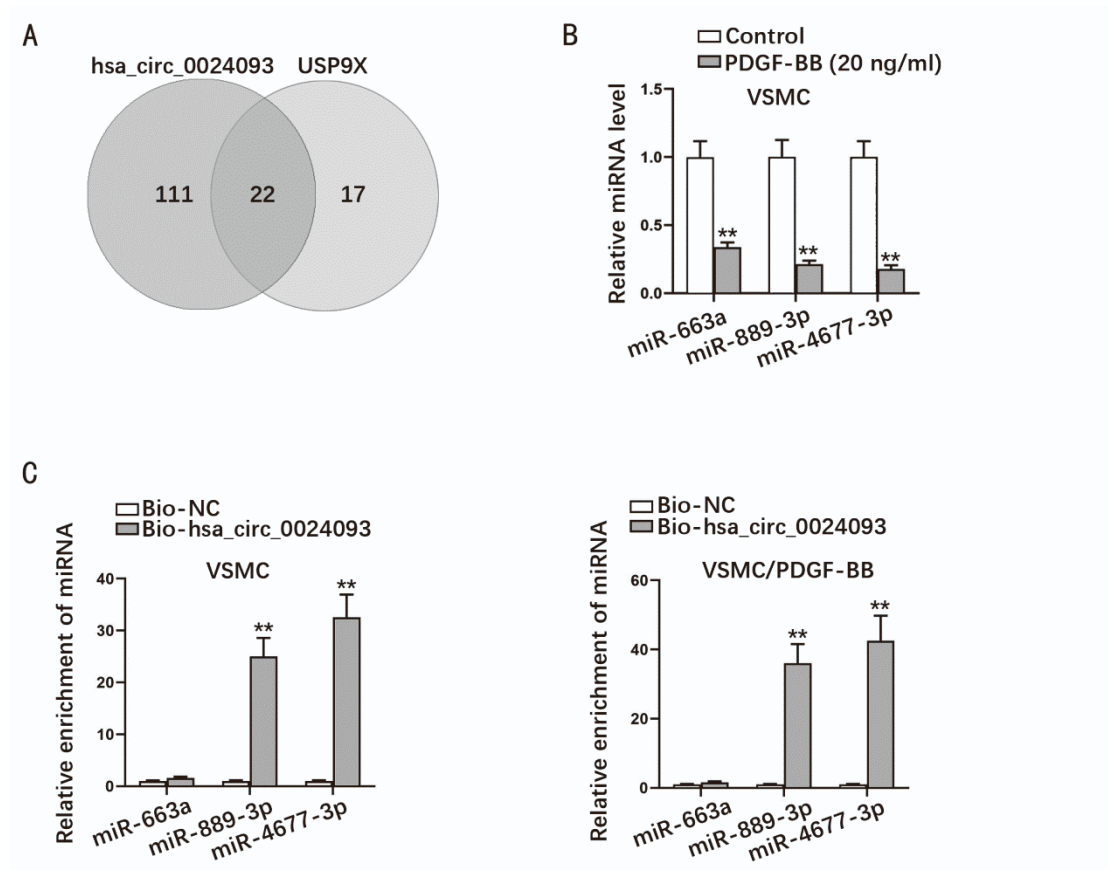

**Figure S5. Hsa\_circ\_0024093 interacts with miR-889-3p and miR-4677-3p in VSMCs.**

A. ENCORI database predicted 22 miRNAs binding with hsa\_circ\_0024093 and USP9X. B. The level of miR-663a, miR-889-3p and miR-4677-3p was examined in VSMCs with or without PDGF-BB treatment. C. The enrichment of miR-663a, miR-889-3p and miR-4677-3p in Bio-hsa\_circ\_0024093 groups was detected.

\*\*P<0.01.
